# Supplementary material for: Hidden-break diversity in pancrustacean rRNA profiles
Source: PeerJ. 2026 Feb 3;14:e20693. doi: 10.7717/peerj.20693 (PMC12880105; doi:10.7717/peerj.20693)
Supplement: Supplemental Information 2 — Fragment Analyzer measurements (raw data) were carried out at the SCSIE facilities soon after the extraction. [file peerj-14-20693-s002.xlsx]

## Sheet: RawData
ORDER	Species	Extraction Date	SCSIE FragAna	28a	28b	28S	18S
Amphipoda	Echinogammarus sp.	2023-07-27	2023-09-19			2110	2439
Amphipoda	Haploginglymus sp.	2023-06-23	2023-07-03			2446	2446
Amphipoda	Sensonator valentiensis	2024-02-13	2024-02-21			2282	2873
Decapoda	Dugastella valentina	2024-03-22	2024-03-22	2115	2800		1947
Decapoda	Dugastella valentina	2024-03-22	2024-03-22	2000	2657		1886
Decapoda	Dugastella valentina	2024-03-22	2024-03-22	2129	2786		1947
Decapoda	Dugastella valentina	2024-03-22	2024-03-22	2001	2629		1869
Decapoda	Dugastella valentina	2024-03-22	2024-03-22	2115	2786		1939
Decapoda	Dugastella valentina	2024-03-22	2024-03-22	2058	2757		1912
Decapoda	Dugastella valentina	2024-03-22	2024-03-22	1991	2700		1877
Decapoda	Dugastella valentina	2024-03-12	2024-03-13	2029	2722		1880
Decapoda	Dugastella valentina	2024-02-13	2024-02-21	2001	2690		1888
Decapoda	Dugastella valentina	2024-02-12	2024-02-21	1974	2634		1854
Decapoda	Dugastella valentina	2024-02-07	2024-02-21	2000	2676		1880
Decapoda	Dugastella valentina	2023-07-05	2023-09-19	2015	2699		1884
Decapoda	Dugastella valentina	2023-07-05	2023-09-19	2000	2672		1867
Decapoda	Dugastella valentina	2023-07-04	2023-09-19	2042	2740		1900
Decapoda	Dugastella valentina	2023-07-04	2023-09-19	2042	2726		1892
Decapoda	Dugastella valentina	2024-03-13	2024-03-13	2043	2750		1888
Decapoda	Dugastella valentina	2024-02-27	2024-03-13	2000	2667		1862
Decapoda	Dugastella valentina	2024-02-27	2024-03-13	2000	2681		1862
Decapoda	Dugastella valentina	2024-03-22	2024-03-22	2229	2943		1904
Decapoda	Dugastella valentina	2024-03-22	2024-03-22	2286	3001		2087
Decapoda	Dugastella valentina	2024-03-22	2024-03-22	1982	2643		1860
Decapoda	Dugastella valentina	2024-03-22	2024-03-22	2244	2957		2030
Decapoda	Dugastella valentina	2024-03-22	2024-03-22	2201	2929		2001
Decapoda	Dugastella valentina	2024-03-22	2024-03-22	2187	2886		1991
Decapoda	Dugastella valentina	2024-03-22	2024-03-22	2244	2971		2044
Decapoda	Dugastella valentina	2024-03-22	2024-03-22	2215	2943		2001
Decapoda	Dugastella valentina	2024-03-22	2024-03-22	2258	2971		2058
Decapoda	Dugastella valentina	2024-03-22	2024-03-22	2258	2986		2058
Decapoda	Dugastella valentina	2024-03-22	2024-03-22	2000	2700		1869
Decapoda	Dugastella valentina	2024-03-22	2024-03-22	1982	2672		1860
Decapoda	Dugastella valentina	2024-03-22	2024-03-22	2229	2957		2001
Decapoda	Dugastella valentina	2024-03-22	2024-03-22	1982	2672		1851
Decapoda	Dugastella valentina	2024-03-22	2024-03-22	2301	3023		2072
Isopoda	Cirolanidae sp.	2024-05-15	2024-05-15	1124	3766		3022
Isopoda	Cirolanidae sp.	2024-05-15	2024-05-15	1124	3766		3044
Isopoda	Cirolanidae sp.	2024-05-15	2024-05-15	1131	3787		3044
Isopoda	Cirolanidae sp.	2024-05-08	2024-05-15	1131	3787		3065
Isopoda	Cirolanidae sp.	2024-05-08	2024-05-15	1131	3766		3065
Isopoda	Cirolanidae sp.	2024-05-08	2024-05-15	1110	3660		2986
Isopoda	Cirolanidae sp.	2024-05-08	2024-05-15	1145	3809		3086
Isopoda	Cirolanidae sp.	2024-05-08	2024-05-15	1124	3724		3022
Isopoda	Cirolanidae sp.	2024-05-08	2024-05-15	1131	3787		3065
Isopoda	Cirolanidae sp.	2024-05-08	2024-05-15	1138	3766		3044
Isopoda	Cirolanidae sp.	2024-05-08	2024-05-15	1131	3745		3001
Isopoda	Cirolanidae sp.	2024-03-12	2024-03-13	1124	3830		3065
Isopoda	Cirolanidae sp.	2024-03-12	2024-03-13	1131	3809		3022
Isopoda	Cirolanidae sp.	2024-02-07	2024-02-21	1147	3891		3001
Isopoda	Cirolanidae sp.	2023-03-30	2023-03-31	1131	3765		3001
Isopoda	Cirolanidae sp.	2023-03-30	2023-03-31	1137	3765		3000
Isopoda	Cirolanidae sp.	2023-03-30	2023-03-31	1157	3843		3079
Isopoda	Cirolanidae sp.	2023-03-30	2023-03-31	1131	3785		3021
Isopoda	Cirolanidae sp.	2023-03-29	2023-03-31	1118	3628		2910
Isopoda	Cirolanidae sp.	2023-03-29	2023-03-31	1111	3549		2872
Isopoda	Cirolanidae sp.	2023-03-29	2023-03-31	1111	3608		2910
Isopoda	Cirolanidae sp.	2023-03-29	2023-03-31	1118	3628		2910
Isopoda	Cirolanidae sp.	2023-03-28	2023-03-31	1111	3647		2898
Isopoda	Cirolanidae sp.	2023-03-28	2023-03-31	1124	3687		2898
Isopoda	Cirolanidae sp.	2023-03-28	2023-03-31	1137	3687		2936
Isopoda	Cirolanidae sp.	2023-03-28	2023-03-31	1131	3687		2936
Isopoda	Cirolanidae sp.	2023-03-23	2023-03-31	1118	3628		2910
Isopoda	Cirolanidae sp.	2023-03-23	2023-03-31	1118	3628		2923
Isopoda	Cirolanidae sp.	2023-03-23	2023-03-31	1118	3608		2898
Isopoda	Cirolanidae sp.	2023-03-23	2023-03-31	1111	3589		2872
Isopoda	Cirolanidae sp.	2022-12-21	2023-09-19	1110	3766		3001
Isopoda	Cirolanidae sp.	2022-12-21	2023-09-19	1138	3809		3000
Isopoda	Cirolanidae sp.	2023-08-04	2023-09-19	1158	3894		3129
Isopoda	Cirolanidae sp.	2023-08-04	2023-09-19	1151	3894		3107
Isopoda	Cirolanidae sp.	2023-08-04	2023-09-19	1138	3766		3001
Isopoda	Lekanesphaera hookeri	2024-05-15	2024-05-15	1992	2265		2695
Isopoda	Lekanesphaera hookeri	2022-07-26	2022-08-08	1950	2223		2667
Isopoda	Lekanesphaera hookeri	2022-07-25	2022-08-08	2000	2334		2810
Isopoda	Lekanesphaera hookeri	2022-07-25	2022-08-08	1933	2191		2651
Isopoda	Lekanesphaera hookeri	2022-07-18	2022-07-22	2232	2539		2923
Isopoda	Lekanesphaera hookeri	2022-07-18	2022-07-22	2257	2552		2949
Isopoda	Lekanesphaera hookeri	2022-07-18	2022-07-22	2232	2539		2923
Anostraca	Artemia salina	2023-06-30	2023-07-03			1831	1831
Anostraca	Artemia salina	2023-06-30	2023-07-03			1780	1780
Anostraca	Artemia salina	2023-06-30	2023-07-03			1797	1797
Anostraca	Artemia salina	2023-06-30	2023-07-03			1789	1789
Anostraca	Artemia salina	2023-06-30	2023-07-03			1805	1805
Anostraca	Artemia salina	2023-06-30	2023-07-03			1805	1805
Anostraca	Artemia salina	2023-06-30	2023-07-03			1805	1805
Anostraca	Artemia salina	2023-06-30	2023-07-03			1797	1797
Anostraca	Branchipus schaefferi	2023-06-20	2023-07-03			1839	1839
Anostraca	Branchipus schaefferi	2023-06-20	2023-07-03			1856	1856
Anostraca	Branchipus schaefferi	2023-06-20	2023-07-03			1890	1890
Anostraca	Branchipus schaefferi	2023-06-20	2023-07-03			1915	1915
Anostraca	Branchipus schaefferi	2023-06-20	2023-07-03			1865	1865
Anostraca	Branchipus schaefferi	2023-06-20	2023-07-03			1873	1873
Anostraca	Branchipus schaefferi	2023-06-29	2023-07-03			1873	1873
Anostraca	Branchipus schaefferi	2023-06-29	2023-07-03			1873	1873
Anostraca	Branchipus schaefferi	2023-07-03	2023-07-03			1882	1882
Anostraca	Branchipus schaefferi	2023-07-03	2023-07-03			1890	1890
Anostraca	Branchipus schaefferi	2023-07-03	2023-07-03			1890	1890
Anostraca	Branchipus schaefferi	2023-06-23	2023-07-03			1865	1865
Notostraca	Triops simplex	2023-06-19	2023-07-03			1958	1958
Notostraca	Triops simplex	2023-06-19	2023-07-03			1932	1932
Notostraca	Triops simplex	2023-06-19	2023-07-03			1924	1924
Notostraca	Triops simplex	2023-06-19	2023-07-03			1924	1924
Notostraca	Triops simplex	2023-06-20	2023-07-03			1966	1966
Notostraca	Triops simplex	2023-06-20	2023-07-03			1966	1966
Notostraca	Triops simplex	2023-06-21	2023-07-03			1983	1983
Notostraca	Triops simplex	2023-06-20	2023-07-03			1966	1966
Notostraca	Triops simplex	2023-06-20	2023-07-03			1907	1907
Notostraca	Triops simplex	2023-06-20	2023-07-03			1924	1924
Notostraca	Triops simplex	2023-06-20	2023-07-03			1899	1899
Notostraca	Triops simplex	2023-06-29	2023-07-03			1899	1899
Notostraca	Triops simplex	2023-06-29	2023-07-03			1890	1890
Notostraca	Triops simplex	2023-06-29	2023-07-03			1915	1915
Notostraca	Triops simplex	2023-07-03	2023-07-03			1907	1907
Notostraca	Triops simplex	2023-07-03	2023-07-03			1907	1907
Notostraca	Triops simplex	2023-06-23	2023-07-03			1899	1899
Podocopida	Cyprideis torosa	2022-07-08	2022-07-22			1881	1881
Podocopida	Cyprideis torosa	2022-07-01	2022-07-05			1662	1662
Podocopida	Cyprideis torosa	2022-07-01	2022-07-05			1686	1686
Podocopida	Cyprideis torosa	2022-07-01	2022-07-05			1670	1670
Podocopida	Cyprideis torosa	2022-06-22	2022-07-01			1822	1822
Podocopida	Cyprideis torosa	2022-06-22	2022-07-01			1789	1789
Podocopida	Cyprideis torosa	2022-06-22	2022-07-01			1822	1822
Podocopida	Cyprideis torosa	2022-06-22	2022-07-01			1814	1814
Podocopida	Cyprideis torosa	2022-06-22	2022-07-01			1839	1839
Podocopida	Cyprideis torosa	2022-06-22	2022-07-01			1839	1839
Podocopida	Cyprideis torosa	2022-06-10	2022-06-14			1724	1724
Podocopida	Cyprideis torosa	2022-06-10	2022-06-14			1708	1708
Podocopida	Cyprideis torosa	2022-06-02	2022-06-06			1723	1723
Podocopida	Cyprideis torosa	2022-06-02	2022-06-06			1723	1723
Podocopida	Cyprideis torosa	2022-05-27	2022-05-30			1853	1853
Podocopida	Cyprideis torosa	2022-05-27	2022-05-30			1845	1845
Podocopida	Eucypris virens	2023-07-26	2023-09-19			1950	1950
Podocopida	Eucypris virens	2023-07-26	2023-09-19			1967	1967
Podocopida	Eucypris virens	2023-07-26	2023-09-19			1967	1967
Podocopida	Eucypris virens	2023-07-26	2023-09-19			1975	1975
Table S1. Length of the 18S and 28S rRNA genes across Pancrustacea based on Fragment Analyzer estimates
